# Supplementary material for: Enzymatic C–H activation of aromatic compounds through CO2 fixation
Source: Springer Nature journal article supplement (doi:10.1038/s41589-020-0603-0), 2020-07-27
Supplement: 41589_2020_603_MOESM1_ESM.mol [file 41589_2020_603_MOESM1_ESM.mol]

nchembio.A200110674B-comp1.mol
  ChemDraw06242022272D

  8  8  0  0  0  0  0  0  0  0999 V2000
   -1.4289    0.4125    0.0000 C   0  0  0  0  0  0  0  0  0  0  0  0
   -1.4289   -0.4125    0.0000 C   0  0  0  0  0  0  0  0  0  0  0  0
   -0.7145   -0.8250    0.0000 C   0  0  0  0  0  0  0  0  0  0  0  0
   -0.0000   -0.4125    0.0000 C   0  0  0  0  0  0  0  0  0  0  0  0
   -0.0000    0.4125    0.0000 C   0  0  0  0  0  0  0  0  0  0  0  0
   -0.7145    0.8250    0.0000 C   0  0  0  0  0  0  0  0  0  0  0  0
    0.7145    0.8250    0.0000 C   0  0  0  0  0  0  0  0  0  0  0  0
    1.4289    0.4125    0.0000 C   0  0  0  0  0  0  0  0  0  0  0  0
  1  2  2  0      
  2  3  1  0      
  3  4  2  0      
  4  5  1  0      
  5  6  2  0      
  6  1  1  0      
  5  7  1  0      
  7  8  2  0      
M  END
